# Supplementary material for: Identification of Risk Factors for African Swine Fever: A Systematic Review
Source: Viruses. 2022 Sep 23;14(10):2107. doi: 10.3390/v14102107 (PMC9611626; doi:10.3390/v14102107)
Supplement: Supplementary file 1 [file viruses-14-02107-s001.zip]

Archive with 8 entries (8 files):
- Table S1-prismachecklist.pdf
- Table S2-excluded.xlsx
- Table S3-selected.xlsx
- Table S4-obsrf.xlsx
- Table S5-potrf.xlsx
- Table S6-rake.xlsx
- Text S1-searchstrings.txt
- Text S2-method.pdf
