# Supplementary material for: Identification of Risk Factors for African Swine Fever: A Systematic Review
Source: Viruses. 2022 Sep 23;14(10):2107. doi: 10.3390/v14102107 (PMC9611626; doi:10.3390/v14102107)
Supplement: Supplementary file 1 [file viruses-14-02107-s001.zip › Table S4-obsrf.xlsx]

## Sheet: Sheet 1
riskfactor
