# Supplementary material for: Identification of Risk Factors for African Swine Fever: A Systematic Review
Source: Viruses. 2022 Sep 23;14(10):2107. doi: 10.3390/v14102107 (PMC9611626; doi:10.3390/v14102107)
Supplement: Supplementary file 1 [file viruses-14-02107-s001.zip › Text S1-searchstrings.txt]

#PUBMED
(("African Swine Fever"[Mesh Terms] OR "African Swine Fever Virus"[ Mesh Terms] OR "ASFV"[ Mesh Terms] OR "Asfarviridae"[ Mesh Terms] OR "Asfivirus"[ Mesh Terms] OR "ASFV infection"[ Mesh Terms] OR "African Swine Fever related Viruses"[ Mesh Terms] OR "ASF-Virus"[ Mesh Terms]) 
AND 
("Risk"[Mesh Terms] OR "Risk Factor"[Mesh Terms] OR "Risk Assessment"[Mesh Terms] OR "Protective Factor"[Mesh Terms] OR "Risk calculation"[Mesh Terms] OR "Risk aspect"[Mesh Terms] OR "Risk pathway"[Mesh Terms] OR "Risk feature"[Mesh Terms] OR "Disease Association"[Mesh Terms] OR "Epidemiologic Methods"[Mesh Terms] OR "Epidemiology"[Mesh Terms] OR "Logistic Models"[Mesh Terms] OR "Prevalence"[Mesh Terms] OR "Probability"[Mesh Terms] OR "Seroepidemiologic Studies"[Mesh Terms] OR "Seroprevalence"[Mesh Terms] OR "Transmission"[Mesh Terms] OR "Epidemiologic Studies"[Mesh Terms] OR "Epidemiological Studies"[Mesh Terms] OR "Epidemiological Methods"[Mesh Terms] OR "Regression"[Mesh Terms] OR "Logistic Regression"[Mesh Terms] OR "Occurrence"[Mesh Terms] OR "Incidence"[Mesh Terms] OR "Likelihood"[Mesh Terms] OR "Chance"[Mesh Terms] OR "Predictability"[Mesh Terms] OR "Danger"[Mesh Terms] OR "Hazard"[Mesh Terms] OR "Threat"[Mesh Terms] OR "Risk valuation"[Mesh Terms] OR "Risk influence"[Mesh Terms] OR "Spread"[Mesh Terms] OR "Entry"[Mesh Terms]))
OR
(("African Swine Fever"[Title/Abstract] OR "African Swine Fever Virus"[Title/Abstract] OR "ASFV"[Title/Abstract] OR "Asfarviridae"[Title/Abstract] OR "Asfivirus"[Title/Abstract] OR "ASFV infection"[Title/Abstract] OR "African Swine Fever related Viruses"[Title/Abstract] OR "ASF-Virus"[Title/Abstract]) 
AND 
("Risk"[Title/Abstract] OR "Risk Factor"[Title/Abstract] OR "Risk Assessment"[Title/Abstract] OR "Protective Factor"[Title/Abstract] OR "Risk calculation"[Title/Abstract] OR "Risk aspect"[Title/Abstract] OR "Risk pathway"[Title/Abstract] OR "Risk feature"[Title/Abstract] OR "Disease Association"[Title/Abstract] OR "Epidemiologic Methods"[Title/Abstract] OR "Epidemiology"[Title/Abstract] OR "Logistic Models"[Title/Abstract] OR "Prevalence"[Title/Abstract] OR "Probability"[Title/Abstract] OR "Seroepidemiologic Studies"[Title/Abstract] OR "Seroprevalence"[Title/Abstract] OR "Transmission"[Title/Abstract] OR "Epidemiologic Studies"[Title/Abstract] OR "Epidemiological Studies"[Title/Abstract] OR "Epidemiological Methods"[Title/Abstract] OR "Regression"[Title/Abstract] OR "Logistic Regression"[Title/Abstract] OR "Occurrence"[Title/Abstract] OR "Incidence"[Title/Abstract] OR "Likelihood"[Title/Abstract] OR "Chance"[Title/Abstract] OR "Predictability"[Title/Abstract] OR "Danger"[Title/Abstract] OR "Hazard"[Title/Abstract] OR "Threat"[Title/Abstract] OR "Risk valuation"[Title/Abstract] OR "Risk influence"[Title/Abstract] OR "Spread"[Title/Abstract] OR "Entry"[Title/Abstract]))


#SCOPUS
(("African Swine Fever") OR ("African Swine Fever Virus") OR ("ASFV") OR ("Asfarviridae") OR ("Asfivirus") OR ("ASFV infection") OR ("African Swine Fever related Viruses") OR ("ASF-Virus"))
AND
("Risk") OR ("Risk Factor") OR ("Risk Assessment") OR ("Protective Factor") OR ("Risk calculation") OR ("Risk aspect") OR ("Risk pathway") OR ("Risk feature") OR ("Disease Association") OR ("Epidemiologic Methods") OR ("Epidemiology") 
OR 
("Logistic Models") OR ("Prevalence") OR ("Probability") OR ("Seroepidemiologic Studies") OR ("Seroprevalence") OR ("Transmission") OR ("Epidemiologic Studies") OR ("Epidemiological Studies") OR ("Epidemiological Methods") 
OR 
("Regression") OR ("Logistic Regression") OR ("Occurrence") OR ("Incidence") OR ("Likelihood") OR ("Chance") OR ("Predictability") OR ("Danger") OR ("Hazard") OR ("Threat") OR ("Risk valuation") OR ("Risk influence") OR ("Spread") OR ("Entry")


#WEBOFSCIENCE
(("African Swine Fever") OR ("African Swine Fever Virus") OR ("ASFV") OR ("Asfarviridae") OR ("Asfivirus") OR ("ASFV infection") OR ("African Swine Fever related Viruses") OR ("ASF-Virus"))
AND
(("Risk") OR ("Risk Factor") OR ("Risk Assessment") OR ("Protective Factor") OR ("Risk calculation") OR ("Risk aspect") OR ("Risk pathway") OR ("Risk feature") OR ("Disease Association") OR ("Epidemiologic Methods") OR ("Epidemiology") 
OR 
("Logistic Models") OR ("Prevalence") OR ("Probability") OR ("Seroepidemiologic Studies") OR ("Seroprevalence") OR ("Transmission") OR ("Epidemiologic Studies") OR ("Epidemiological Studies") OR ("Epidemiological Methods") 
OR 
("Regression") OR ("Logistic Regression") OR ("Occurrence") OR ("Incidence") OR ("Likelihood") OR ("Chance") OR ("Predictability") OR ("Danger") OR ("Hazard") OR ("Threat") OR ("Risk valuation") OR ("Risk influence") OR ("Spread") OR ("Entry"))


#AGRISFAO
("African Swine Fever" OR "African Swine Fever Virus" OR "ASFV" OR "Asfarviridae" OR "Asfivirus" OR "ASFV infection" OR "African Swine Fever related Viruses" OR "ASF-Virus") AND ("Risk" OR "Risk Factor" OR "Risk Assessment" OR "Protective Factor" OR "Risk calculation" OR "Risk aspect" OR "Risk pathway" OR "Risk feature" OR "Disease Association" OR "Epidemiologic Methods" OR "Epidemiology" OR "Logistic Models" OR "Prevalence" OR "Probability" OR "Seroepidemiologic Studies" OR "Seroprevalence" OR "Transmission" OR "Epidemiologic Studies" OR "Epidemiological Studies" OR "Epidemiological Methods" OR "Regression" OR "Logistic Regression" OR "Occurrence" OR "Incidence" OR "Likelihood" OR "Chance" OR "Predictability" OR "Danger" OR "Hazard" OR "Threat" OR "Risk valuation" OR "Risk influence" OR "Spread" OR "Entry")


#EFSAJOURNAL
("African Swine Fever" OR "African Swine Fever Virus" OR "ASFV" OR "Asfarviridae" OR "Asfivirus" OR "ASFV infection" OR "African Swine Fever related Viruses" OR "ASF-Virus") AND ("Risk" OR "Risk Factor" OR "Risk Assessment" OR "Protective Factor" OR "Risk calculation" OR "Risk aspect" OR "Risk pathway" OR "Risk feature" OR "Disease Association" OR "Epidemiologic Methods" OR "Epidemiology" OR "Logistic Models" OR "Prevalence" OR "Probability" OR "Seroepidemiologic Studies" OR "Seroprevalence" OR "Transmission" OR "Epidemiologic Studies" OR "Epidemiological Studies" OR "Epidemiological Methods" OR "Regression" OR "Logistic Regression" OR "Occurrence" OR "Incidence" OR "Likelihood" OR "Chance" OR "Predictability" OR "Danger" OR "Hazard" OR "Threat" OR "Risk valuation" OR "Risk influence" OR "Spread" OR "Entry")


#OATD
#title
("African Swine Fever" OR "African Swine Fever Virus" OR "ASFV" "Asfarviridae" "Asfivirus" "ASFV infection" "African Swine Fever related Viruses" "ASF-Virus")AND title:("Risk" "Risk Factor" "Risk Assessment" "Protective Factor" "Risk calculation" "Risk aspect" "Risk pathway" "Risk feature" "Disease Association" "Epidemiologic Methods" "Epidemiology" "Logistic Models" "Prevalence" "Probability" "Seroepidemiologic Studies" "Seroprevalence" "Transmission" "Epidemiologic Studies" "Epidemiological Studies" "Epidemiological Methods" "Regression" "Logistic Regression" "Occurrence" "Incidence" "Likelihood" "Chance" "Predictability" "Danger" "Hazard" "Threat" "Risk valuation" "Risk influence" "Spread" "Entry")
#abstract
("African Swine Fever" OR "African Swine Fever Virus" OR "ASFV" "Asfarviridae" "Asfivirus" "ASFV infection" "African Swine Fever related Viruses" "ASF-Virus")AND abstract:("Risk" "Risk Factor" "Risk Assessment" "Protective Factor" "Risk calculation" "Risk aspect" "Risk pathway" "Risk feature" "Disease Association" "Epidemiologic Methods" "Epidemiology" "Logistic Models" "Prevalence" "Probability" "Seroepidemiologic Studies" "Seroprevalence" "Transmission" "Epidemiologic Studies" "Epidemiological Studies" "Epidemiological Methods" "Regression" "Logistic Regression" "Occurrence" "Incidence" "Likelihood" "Chance" "Predictability" "Danger" "Hazard" "Threat" "Risk valuation" "Risk influence" "Spread" "Entry")


#NDLTD
"African Swine Fever" OR "African Swine Fever Virus" OR "ASFV" OR "Asfarviridae" OR "Asfivirus" OR "ASFV infection" OR "African Swine Fever related Virus" OR "ASF-Virus"


#DART
"African Swine Fever" OR "African Swine Fever Virus" OR "ASFV" OR "Asfarviridae" OR "Asfivirus" OR "ASFV infection" OR "African Swine Fever related Virus" OR "ASF-Virus"
